# Supplementary material
Source: publisher site journal article supplement (https://www.spandidos-publications.com/320/downloadSupplementary)
Supplement: Supplementary file 1 [file downloadSupplementary]

Table SI. Reverse transcription-quantitative PCR primer sequences for human genes.

| Gene  | Primer sequence (5'-3')                          | Product length, bp |
|-------|--------------------------------------------------|--------------------|
| MAGT1 | GACCTAGCCGGAGCAAAGTT<br>ACTGGAGTATCGCCAGGAGT     | 371                |
| GAPDH | GGAGCGAGATCCCTCCAAAAT<br>GGCTGTTGTCATACTTCTCATGG | 197                |

MAGT1, magnesium transporter 1.

Table SII. Characteristics of 51 patients with colorectal cancer.

| Patient no. | Sex    | T Grade | N Grade | M Grade | Stage |
|-------------|--------|---------|---------|---------|-------|
| 1           | Male   | 4       | 0       | 0       | 3     |
| 2           | Male   | 4       | 0       | 0       | 3     |
| 3           | Male   | 4       | 0       | 0       | 3     |
| 4           | Female | 3       | 0       | 0       | 2     |
| 5           | Female | 4       | 0       | 0       | 3     |
| 6           | Male   | 2       | 0       | 0       | 2     |
| 7           | Male   | 3       | 0       | 0       | 2     |
| 8           | Male   | 3       | 0       | 0       | 2     |
| 9           | Male   | 2       | 0       | 0       | 2     |
| 10          | Female | 3       | 0       | 0       | 2     |
| 11          | Female | 3       | 0       | 0       | 2     |
| 12          | Male   | 3       | 0       | 0       | 2     |
| 13          | Male   | 3       | 0       | 0       | 2     |
| 14          | Female | 4       | 0       | 0       | 3     |
| 15          | Male   | 3       | 0       | 0       | 2     |
| 16          | Female | 4       | 0       | 0       | 3     |
| 17          | Male   | 3       | 0       | 0       | 2     |
| 18          | Male   | 4       | 0       | 1       | 4     |
| 19          | Female | 4       | 0       | 0       | 3     |
| 20          | Female | 4       | 1       | 1       | 4     |
| 21          | Male   | 4       | 1       | 1       | 4     |
| 22          | Male   | 4       | 1       | 1       | 4     |
| 23          | Male   | 4       | 1       | 0       | 3     |
| 24          | Male   | 4       | 1       | 0       | 3     |
| 25          | Female | 4       | 1       | 0       | 3     |
| 26          | Male   | 3       | 1       | 1       | 4     |
| 27          | Male   | 2       | 1       | 1       | 4     |
| 28          | Female | 3       | 1       | 1       | 4     |
| 29          | Male   | 4       | 1       | 0       | 3     |
| 30          | Male   | 4       | 1       | 1       | 4     |
| 31          | Female | 4       | 1       | 1       | 4     |
| 32          | Male   | 3       | 1       | 1       | 4     |
| 33          | Female | 4       | 2       | 1       | 4     |
| 34          | Female | 4       | 2       | 1       | 4     |
| 35          | Male   | 4       | 2       | 1       | 4     |
| 36          | Male   | 4       | 2       | 1       | 4     |
| 37          | Male   | 4       | 2       | 1       | 4     |
| 38          | Male   | 4       | 2       | 0       | 3     |
| 39          | Male   | 4       | 2       | 0       | 3     |
| 40          | Female | 4       | 0       | 0       | 3     |
| 41          | Female | 3       | 0       | 0       | 2     |
| 42          | Male   | 2       | 0       | 0       | 2     |
| 43          | Female | 2       | 0       | 0       | 2     |
| 44          | Male   | 3       | 0       | 0       | 2     |
| 45          | Male   | 3       | 0       | 0       | 2     |
| 46          | Female | 3       | 0       | 0       | 2     |
| 47          | Male   | 3       | 0       | 0       | 2     |
| 48          | Male   | 3       | 0       | 0       | 2     |
| 49          | Male   | 3       | 0       | 0       | 2     |
| 50          | Male   | 4       | 2       | 0       | 3     |
| 51          | Female | 3       | 2       | 1       | 4     |

T, tumor; N, node; M, metastasis.
